# Supplementary material for: Anti-inflammatory sesquiterpenes from the medicinal herb Tanacetum sinaicum
Source: Royal Society of Chemistry journal article supplement (doi:10.1039/c5ra07511d), 2015-01-01

## Supplementary Material

### Anti-Inflammatory Sesquiterpenes from the Medicinal Herb *Tanacetum sinaicum*

Mohamed-Elamir F. Hegazy,<sup>a</sup> Ahmed R. Hamed,<sup>a</sup> Tarik A. Mohamed,<sup>a</sup> Abdessamad Debbab,<sup>b</sup>  
Seikou Nakamura,<sup>c</sup> Hisashi Matsuda<sup>c</sup> and Paul W. Paré<sup>\*,d</sup>

<sup>a</sup>Phytochemistry Department and Center of Excellence for Advanced Sciences, National Research Centre, 33 El Bohouth st. (Former El Tahrir st.) Dokki, Giza, Egypt, P. O. 12622.

<sup>b</sup>Pharmaceutical Institut für Pharmazeutische Biologie und Biotechnologie, Heinrich-Heine-Universität Düsseldorf, Universitätsstrasse 1, Geb. 26.23, D-40225 Düsseldorf, Germany

<sup>c</sup>Kyoto Pharmaceutical University, Misasagi, Yamashina-ku, Kyoto 607-8412, Japan

<sup>d</sup>Department of Chemistry & Biochemistry Texas Tech University, Lubbock, TX 79409 USA

## Index

|            |                                                                               |
|------------|-------------------------------------------------------------------------------|
| <b>S3</b>  | <b>Table S1.</b> Cell NO inhibition by <b>1–10</b>                            |
| <b>S4</b>  | <b>Figure S1.</b> MTT cell toxicity                                           |
| <b>S5</b>  | <sup>1</sup> H NMR spectrum <b>1</b> in CDCl <sub>3</sub>                     |
| <b>S6</b>  | <sup>13</sup> C NMR and DEPT spectrum of <b>1</b> in CDCl <sub>3</sub>        |
| <b>S7</b>  | <sup>1</sup> H- <sup>1</sup> H COSY spectrum of <b>1</b> in CDCl <sub>3</sub> |
| <b>S8</b>  | HMQC spectrum of <b>1</b> in CDCl <sub>3</sub>                                |
| <b>S9</b>  | HMBC spectrum of <b>1</b> in CDCl <sub>3</sub>                                |
| <b>S10</b> | NOESY spectrum of <b>1</b> in CDCl <sub>3</sub>                               |
| <b>S11</b> | <sup>1</sup> H NMR spectrum of <b>2</b> in CDCl <sub>3</sub>                  |
| <b>S12</b> | <sup>13</sup> C NMR and DEPT spectrum of <b>2</b> in CDCl <sub>3</sub>        |
| <b>S13</b> | <sup>1</sup> H- <sup>1</sup> H COSY spectrum of <b>2</b> in CDCl <sub>3</sub> |
| <b>S14</b> | HMQC spectrum of <b>2</b> in CDCl <sub>3</sub>                                |
| <b>S15</b> | HMBC spectrum of <b>2</b> in CDCl <sub>3</sub>                                |
| <b>S16</b> | NOESY spectrum of <b>2</b> in CDCl <sub>3</sub>                               |
| <b>S17</b> | <sup>1</sup> H NMR spectrum <b>3</b> in CDCl <sub>3</sub>                     |
| <b>S18</b> | <sup>13</sup> C NMR and DEPT spectrum of <b>3</b> in CDCl <sub>3</sub>        |
| <b>S19</b> | <sup>1</sup> H- <sup>1</sup> H COSY spectrum of <b>3</b> in CDCl <sub>3</sub> |
| <b>S20</b> | HMQC spectrum of <b>3</b> in CDCl <sub>3</sub>                                |
| <b>S21</b> | HMBC spectrum of <b>3</b> in CDCl <sub>3</sub>                                |
| <b>S22</b> | NOESY spectrum of <b>3</b> in CDCl <sub>3</sub>                               |

Table S1. Cell NO inhibition by **1–10**

| Compound       | Concentration of test sample ( $\mu\text{M}$ ) |              |             |             |              |              | IC <sub>50</sub> ( $\mu\text{M}$ ) |
|----------------|------------------------------------------------|--------------|-------------|-------------|--------------|--------------|------------------------------------|
|                | 0                                              | 1            | 3           | 6           | 10           | 30           |                                    |
| Inhibition (%) |                                                |              |             |             |              |              |                                    |
| <b>1</b>       | 0.0±2.2                                        | 6.1±1.7      | 9.8±1.6**   | 20.3±1.2**  | 32.4±1.9**   | 94.3±1.3**   | 15.7                               |
| <b>2</b>       | 0.0± 1.4                                       | 10.5± 2.0    | 2.8± 1.6    | 8.6± 1.4    | 0.4± 2.8     | 4.3± 2.9     | >30                                |
| <b>3</b>       | 0.0± 1.2                                       | 12.5± 2.3    | 3.8± 4.6    | 10.9± 1.8   | 0.6± 3.8     | 6.3± 2.9     | >30                                |
| <b>4</b>       | 0.0± 1.6                                       | 49.0± 15.7** | 62.7± 0.5** | 88.3± 0.5   | 97.6± 0.3**  | 100.7± 0.7** | 1.0                                |
| <b>5</b>       | 0.0± 5.4                                       | 19.3± 5.3    | 14.4± 5.0   | 10.2± 2.2   | 7.0± 1.3     | 19.9± 3.6    | >30                                |
| <b>6</b>       | 0.0± 2.7                                       | 7.9± 2.5     | 29.2± 11.8  | 3.6± 3.3    | 8.8± 2.7     | 19.2± 8.0    | >30                                |
| <b>7</b>       | 0.0± 2.5                                       | 1.9± 1.4     | 6.8± 1.1    | 4.5± 2.3    | 11.3± 3.4**  | 32.0± 0.5**  | >30                                |
| <b>8</b>       | 0.0± 2.6                                       | -2.4± 3.2    | -3.4± 1.6   | -3.9± 2.3   | -24.8± 6.1** | -10.6± 2.2   | >30                                |
| <b>9</b>       | 0.0± 3.3                                       | 28.2± 2.9**  | 24.4± 1.3** | 22.0± 5.7** | 25.9± 1.2**  | 26.9± 2.9**  | >30                                |
| <b>10</b>      | 0.0± 3.9                                       | 41.3± 8.6    | 1.2± 12.8   | 21.1± 4.0   | 4.2± 3.3     | 12.1± 2.9    | >30                                |
| CAPE           | 0.0±0.7                                        | 13.4±0.8**   | 37.8±0.7**  | 84.7±0.9**  | 95.9±0.8**   | -            | 3.1                                |

Values represent means±S.E.M. ( $n=4$ ). Significantly different from the control ( $0 \mu\text{M}$ ), \*\* $p<0.01$

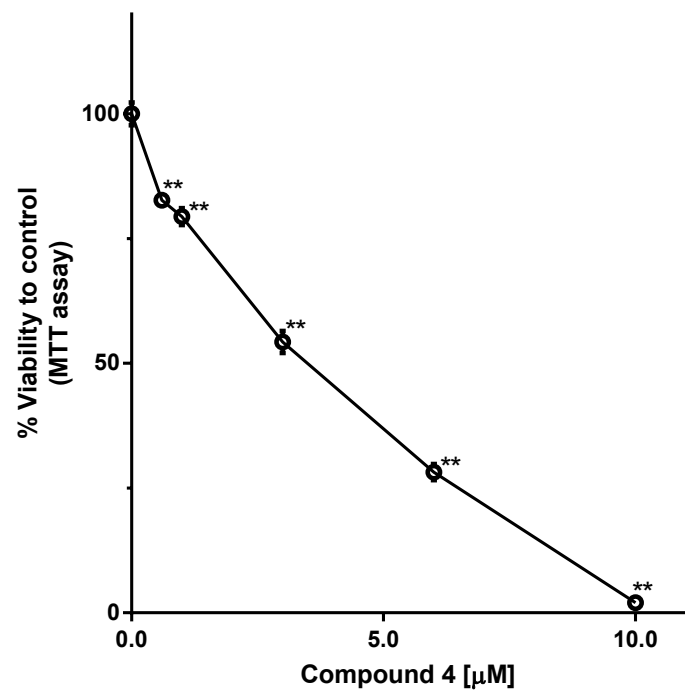

**Figure S1.** MTT cell toxicity for 4 with RAW264.7 cells; values represent means  $\pm$  S.E.M. (n = 4), with significantly differences from solvent control (p < 0.01) indicated (\*\*).

$^1\text{H}$  NMR spectrum 1 in  $\text{CDCl}_3$

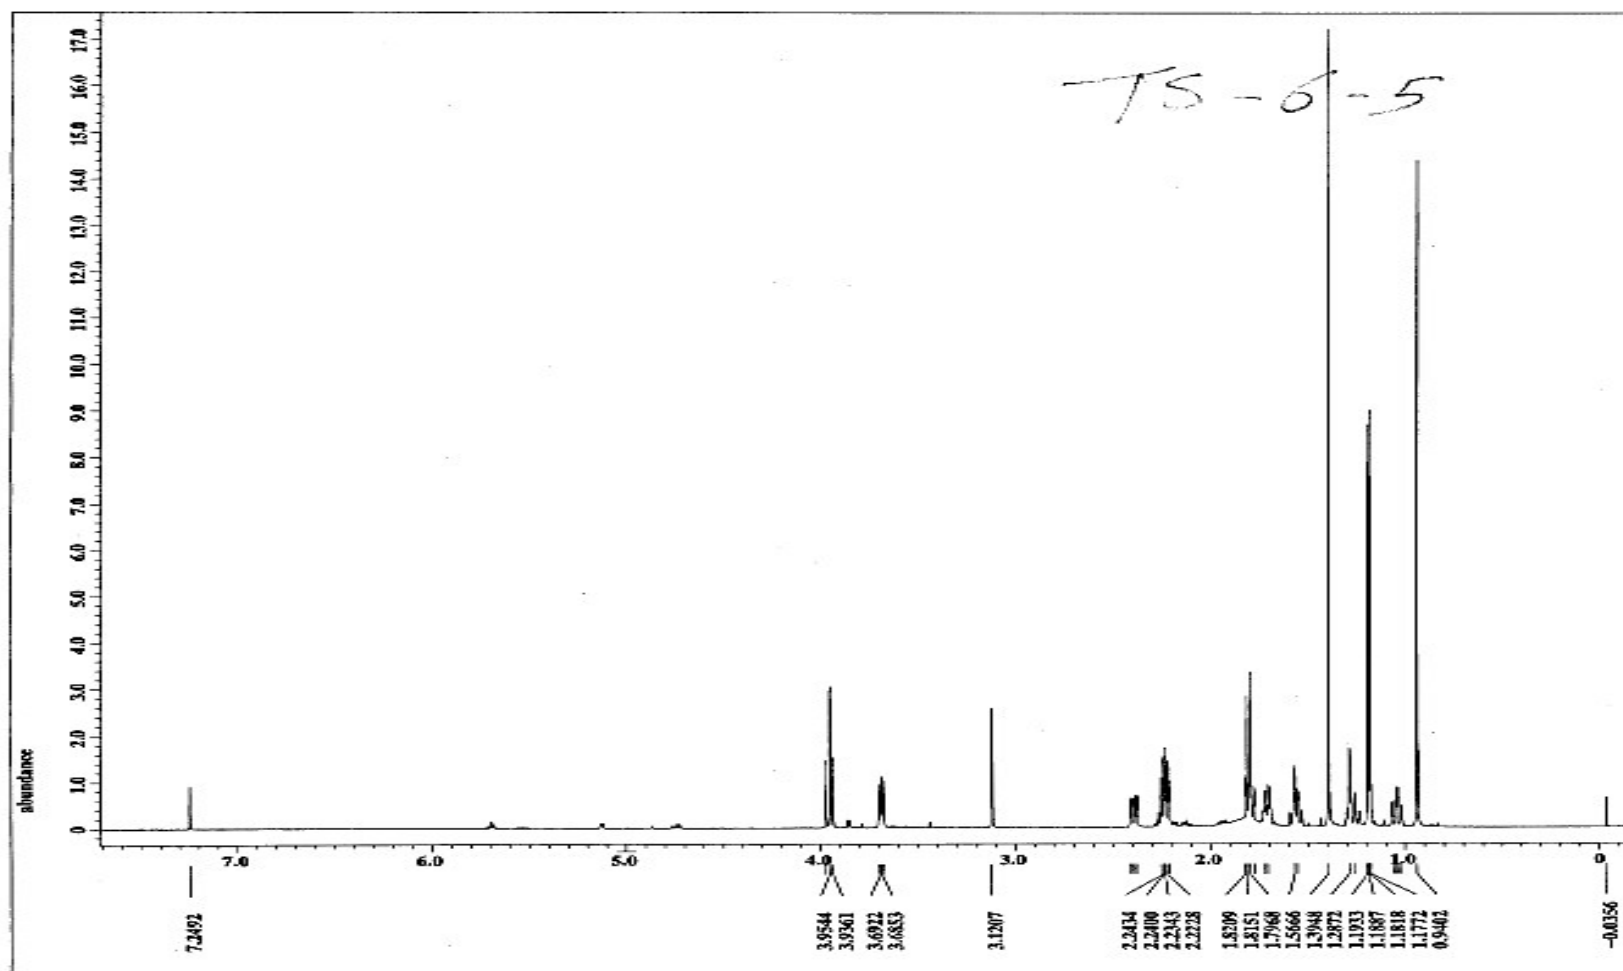

$^{13}\text{C}$  NMR and DEPT spectrum of **1** in  $\text{CDCl}_3$

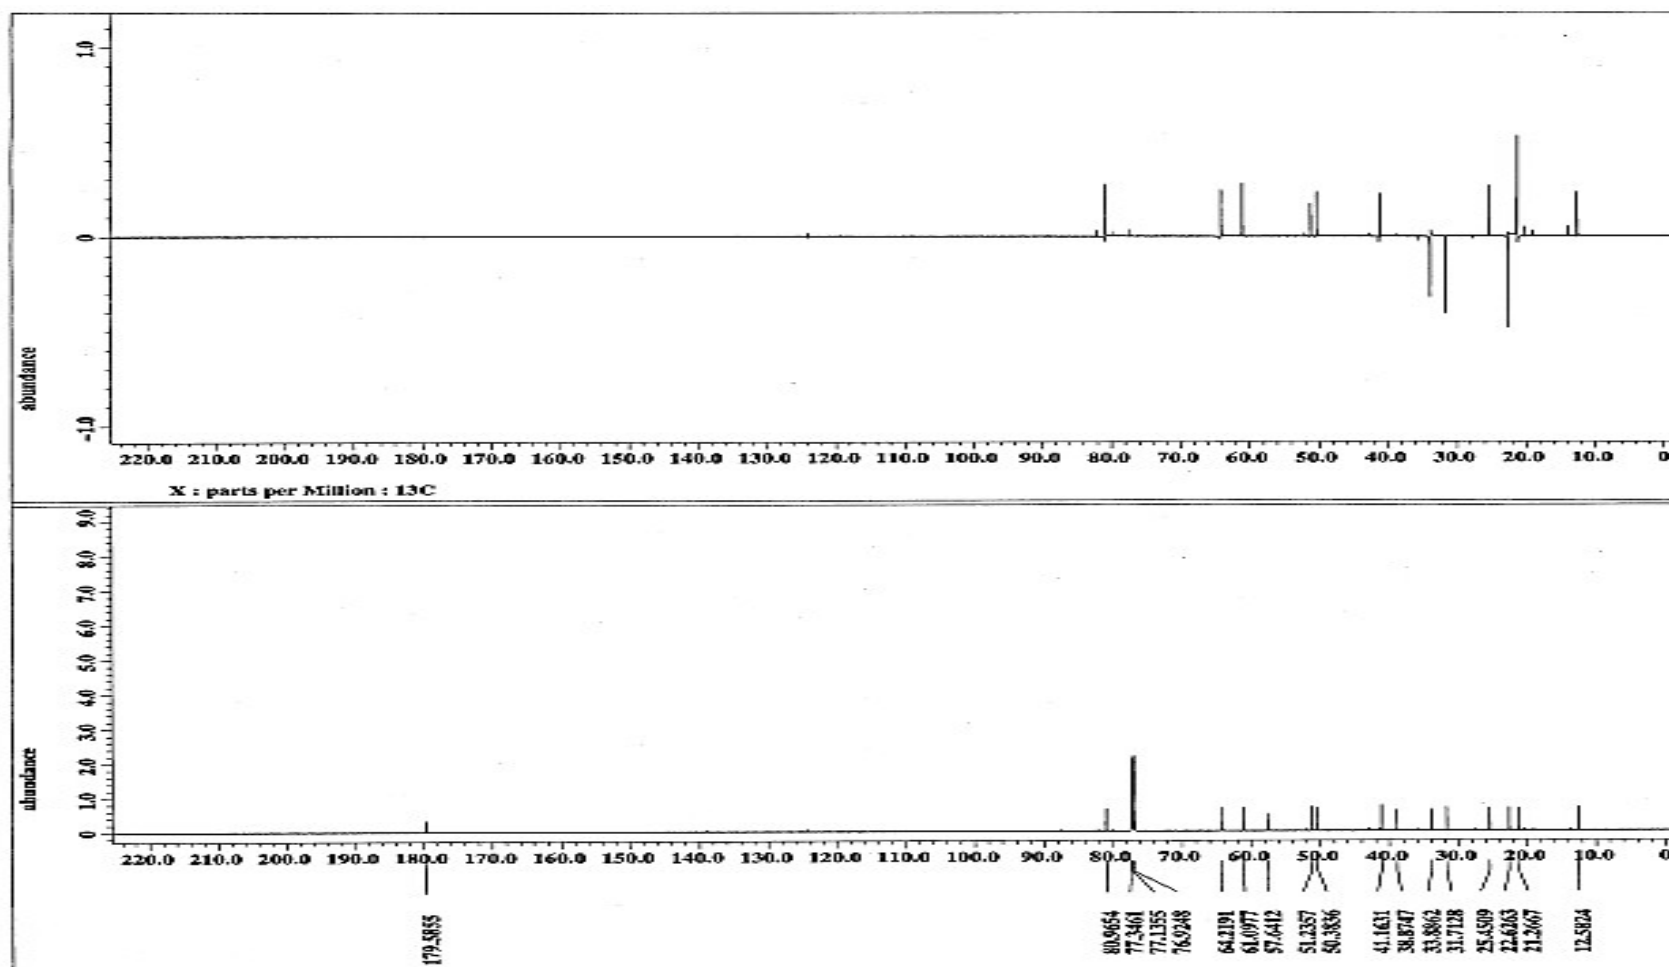



HMQC spectrum of **1** in CDCl<sub>3</sub>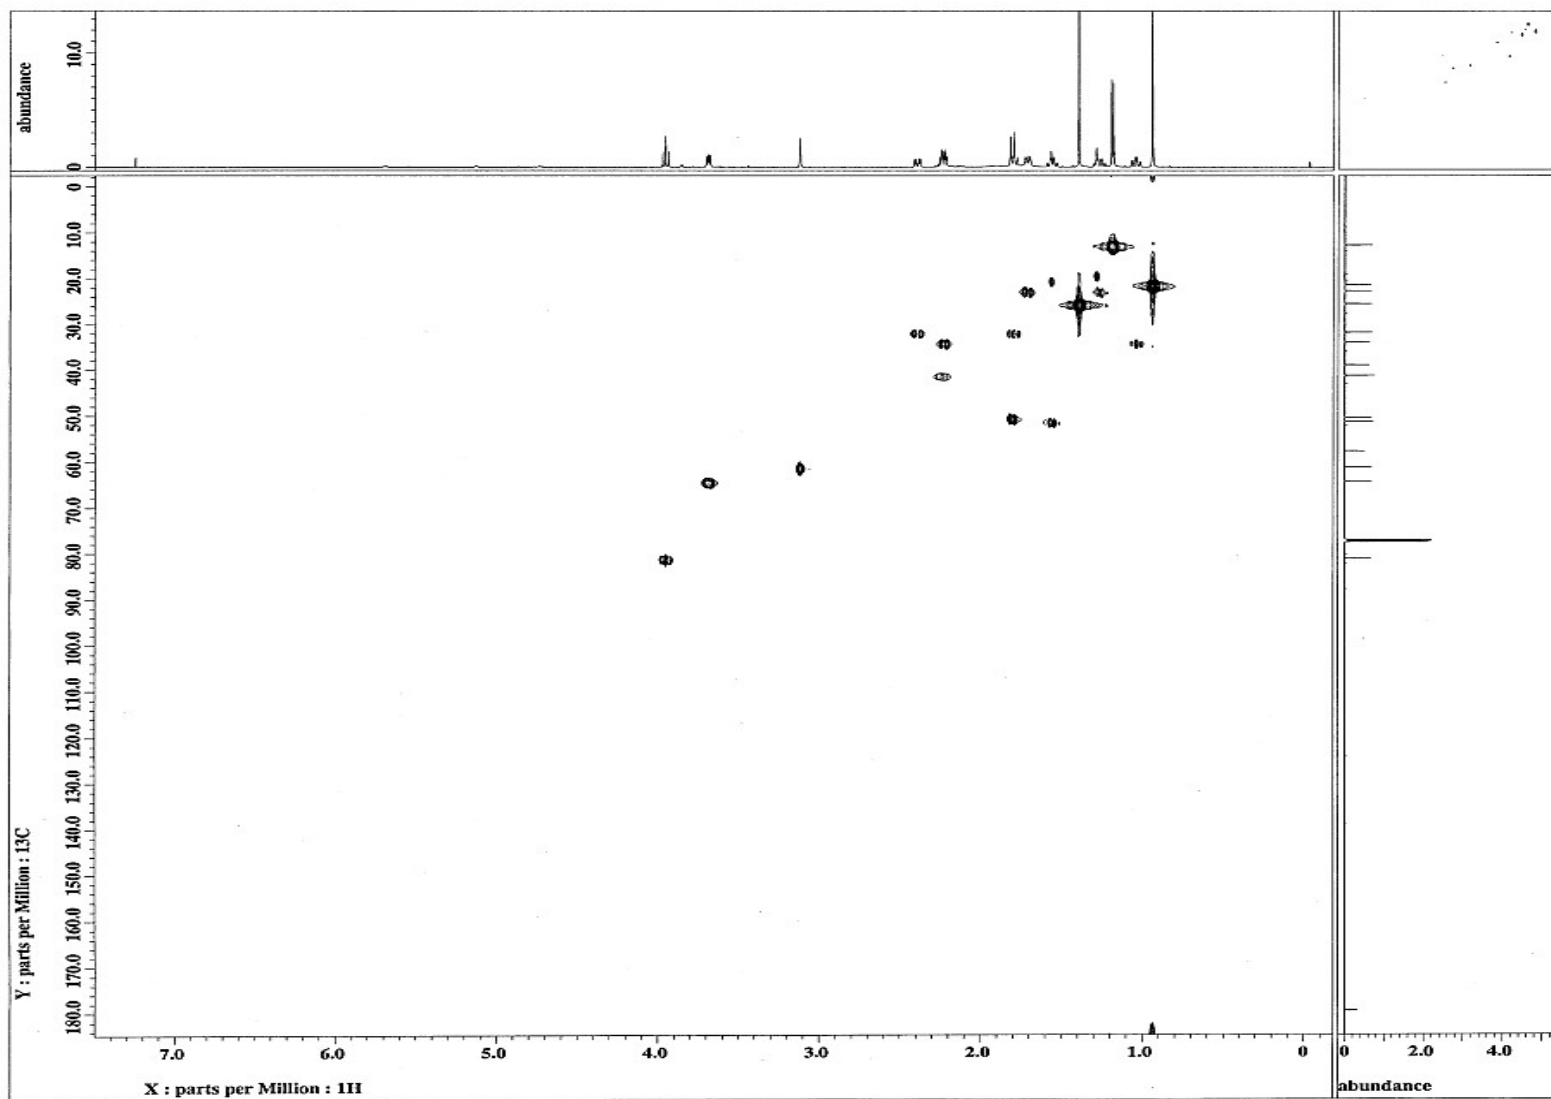



HMBC spectrum of **1** in CDCl<sub>3</sub>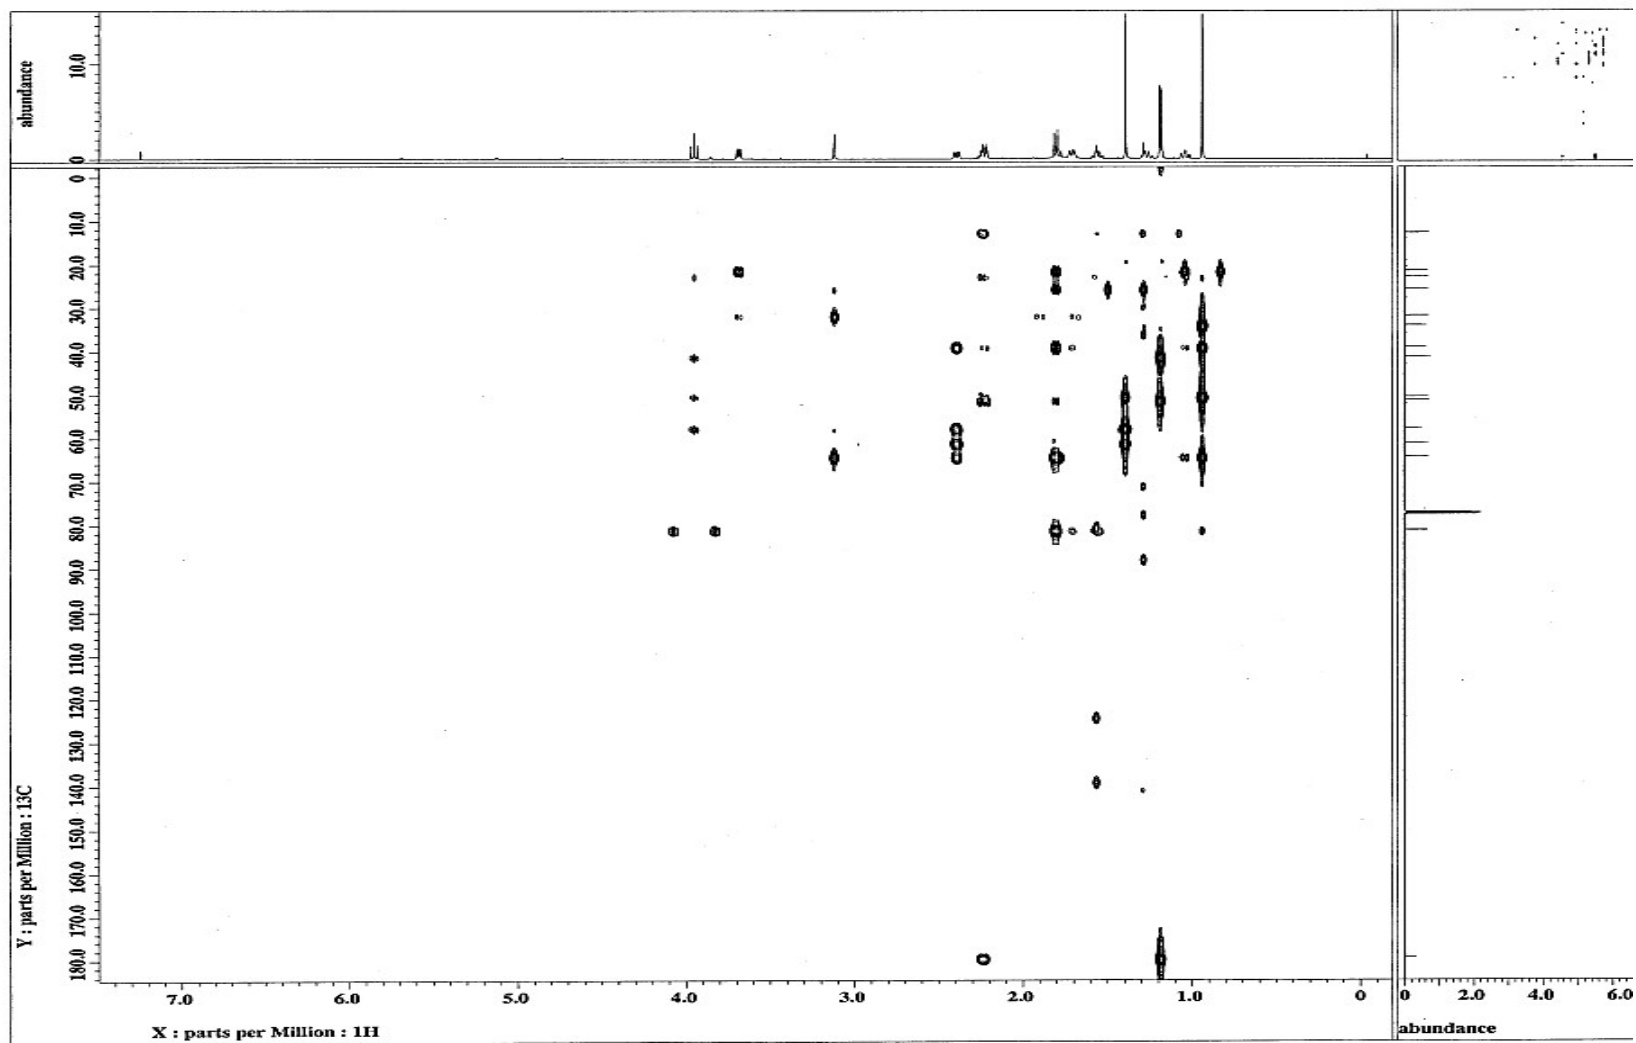

NOESY spectrum of **1** in  $\text{CDCl}_3$ 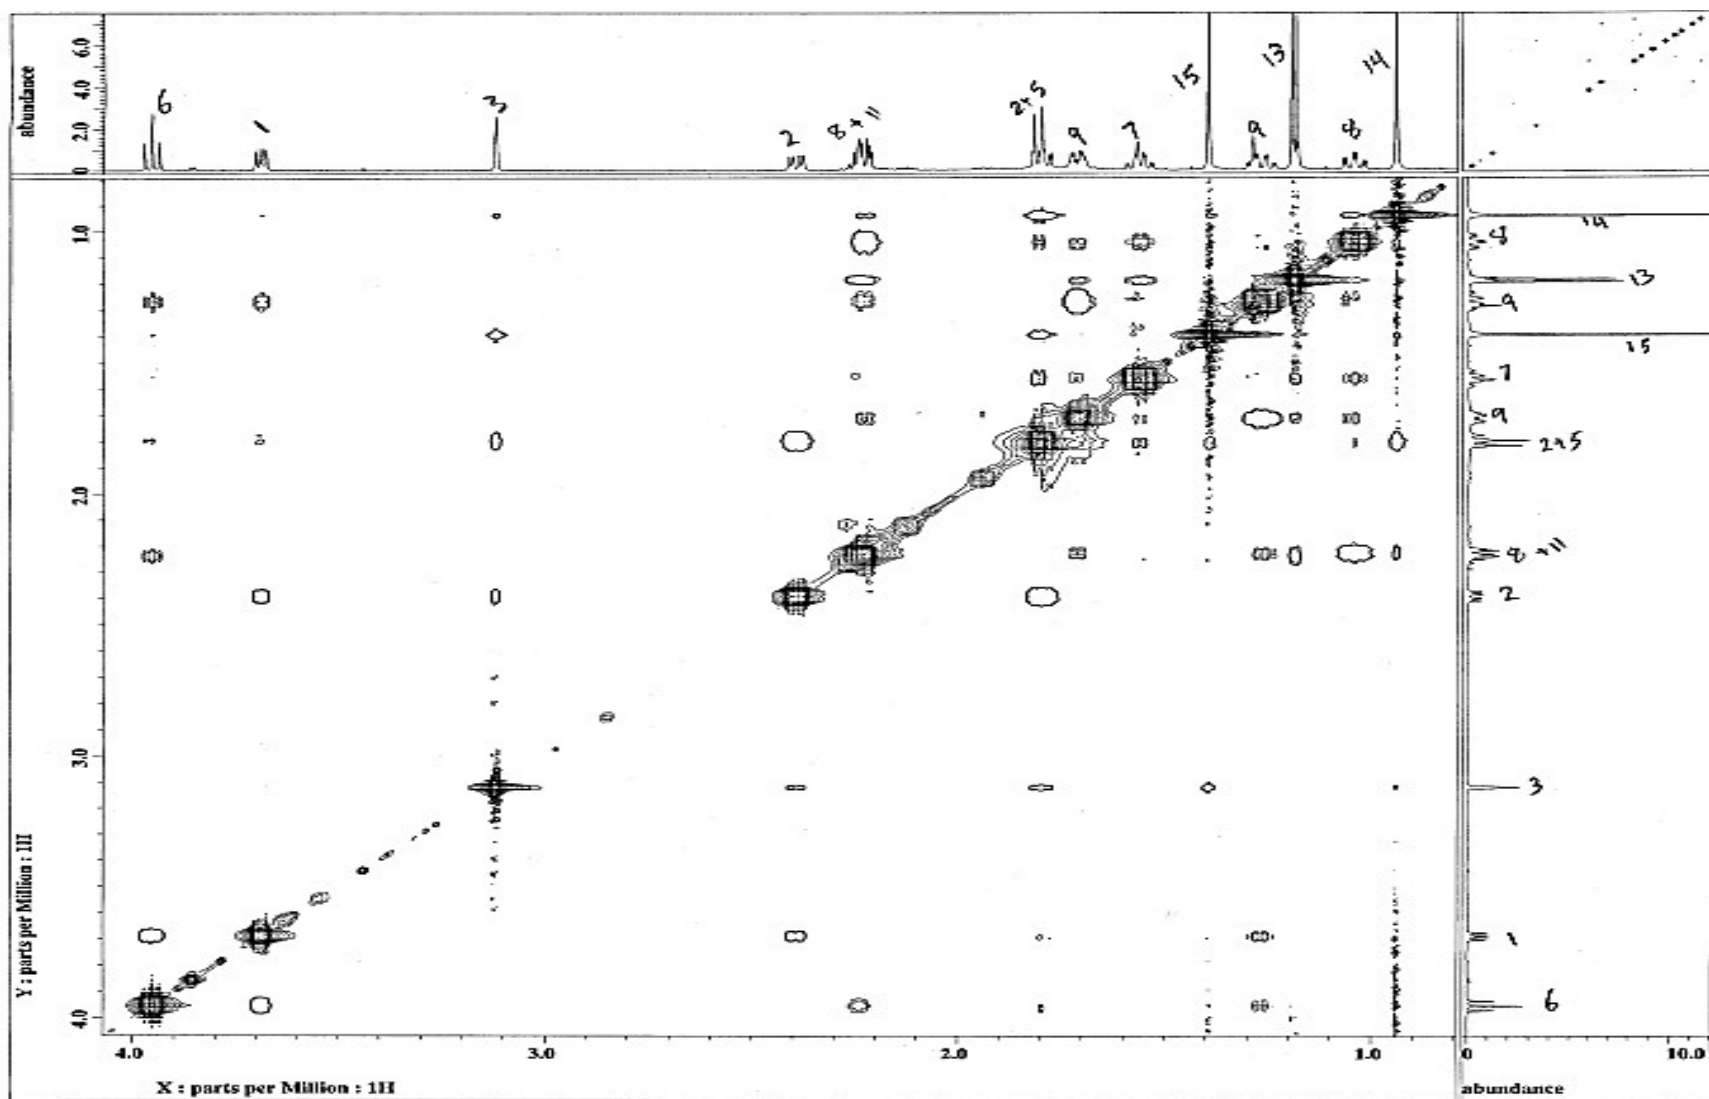

$^1\text{H}$  NMR spectrum of **2** in  $\text{CDCl}_3$

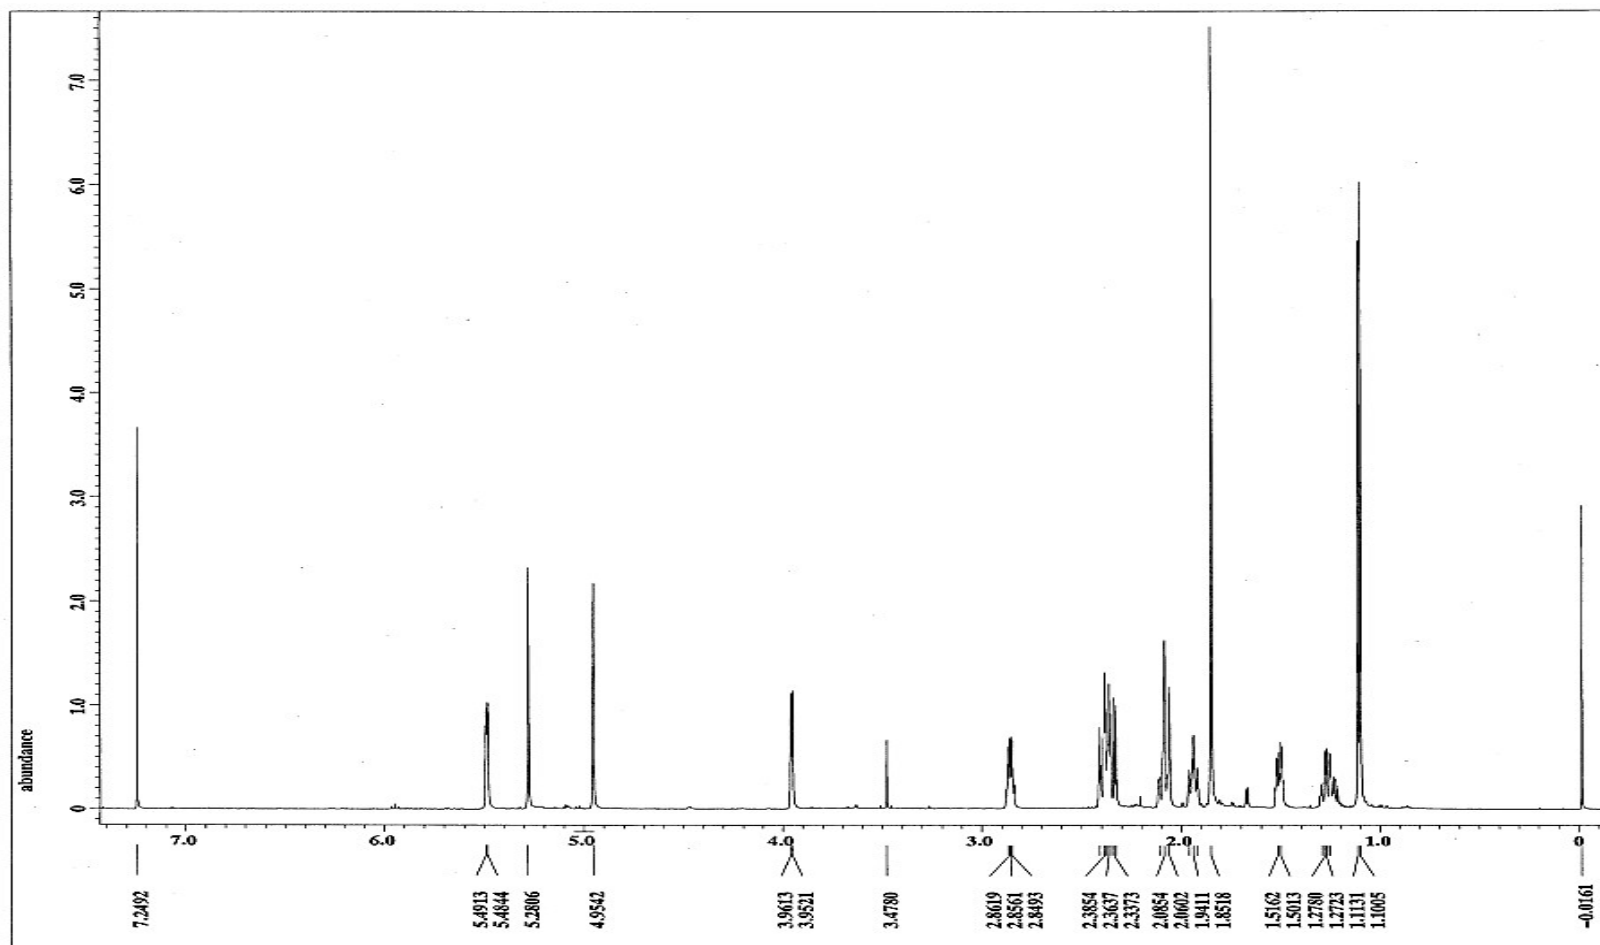

$^{13}\text{C}$  NMR and DEPT spectrum of **2** in  $\text{CDCl}_3$

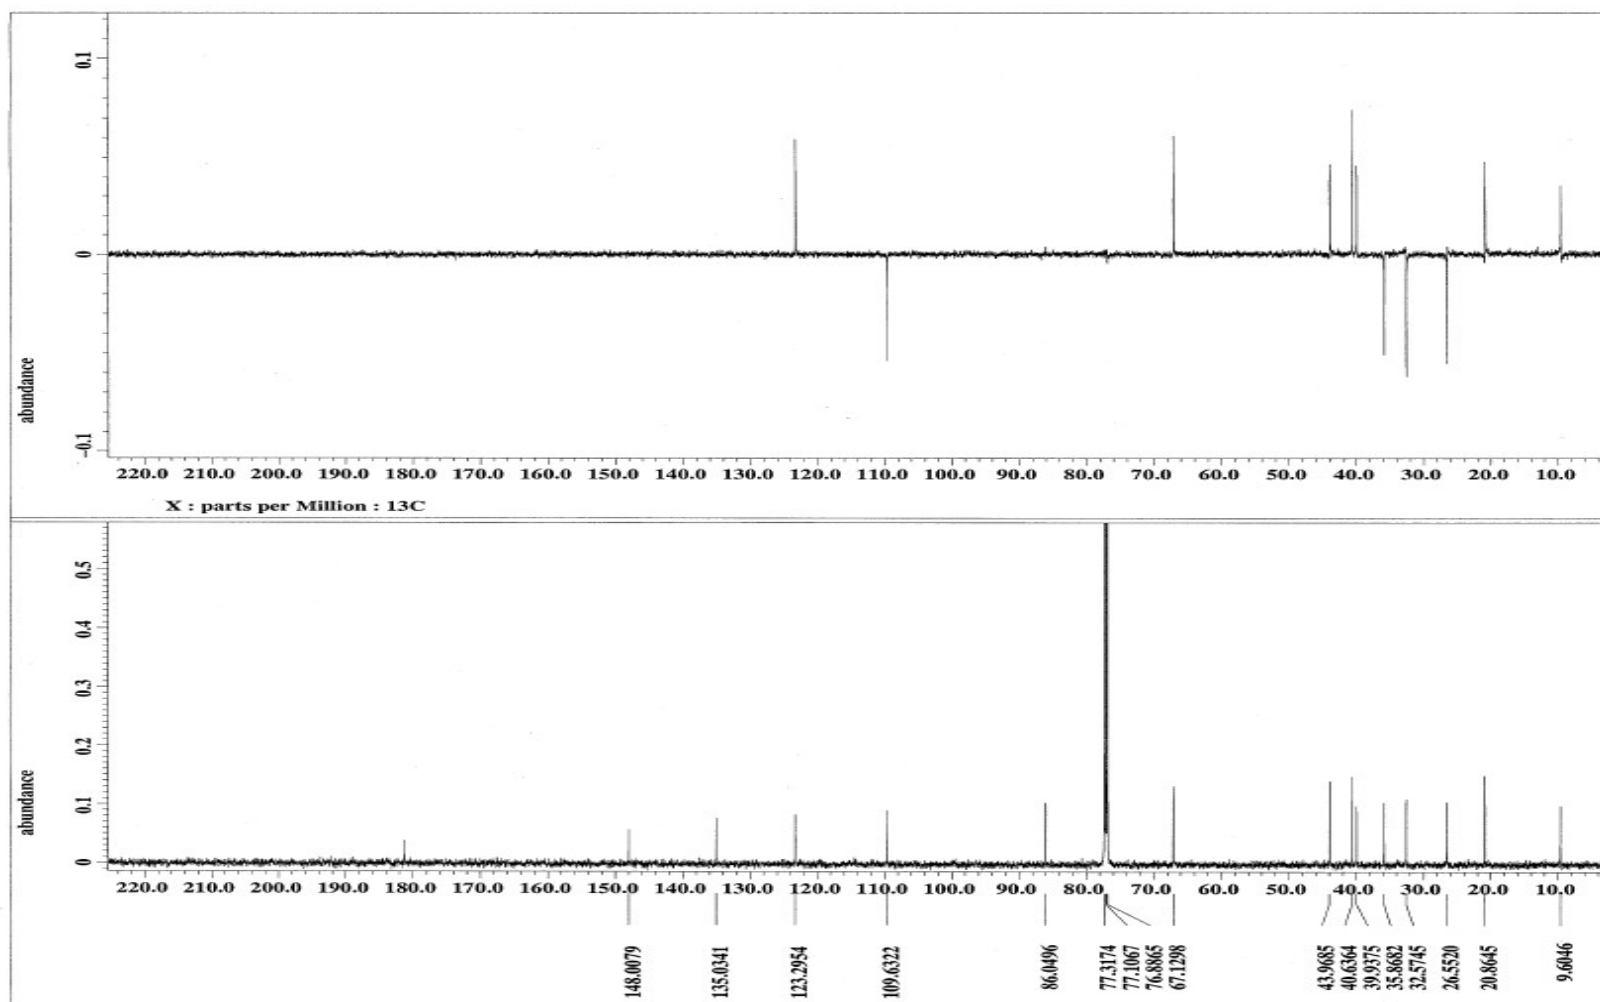

$^1\text{H}$ - $^1\text{H}$  COSY spectrum of **2** in  $\text{CDCl}_3$

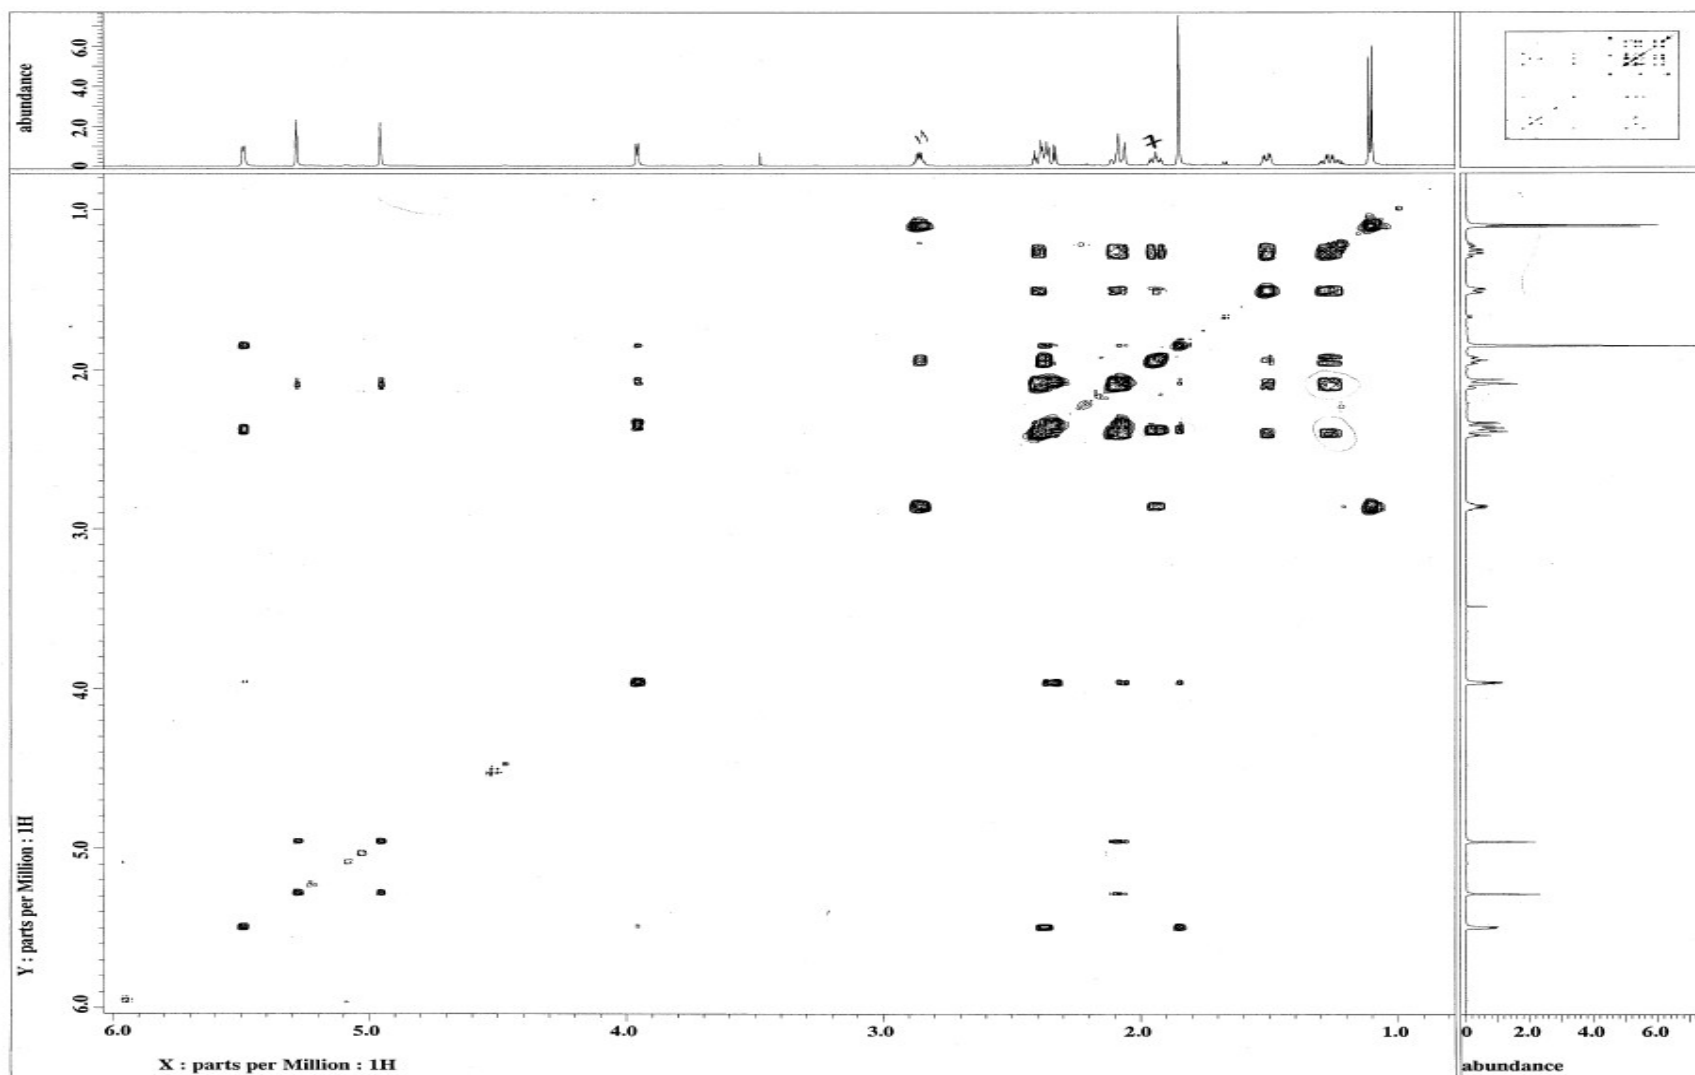

HMQC spectrum of **2** in CDCl<sub>3</sub>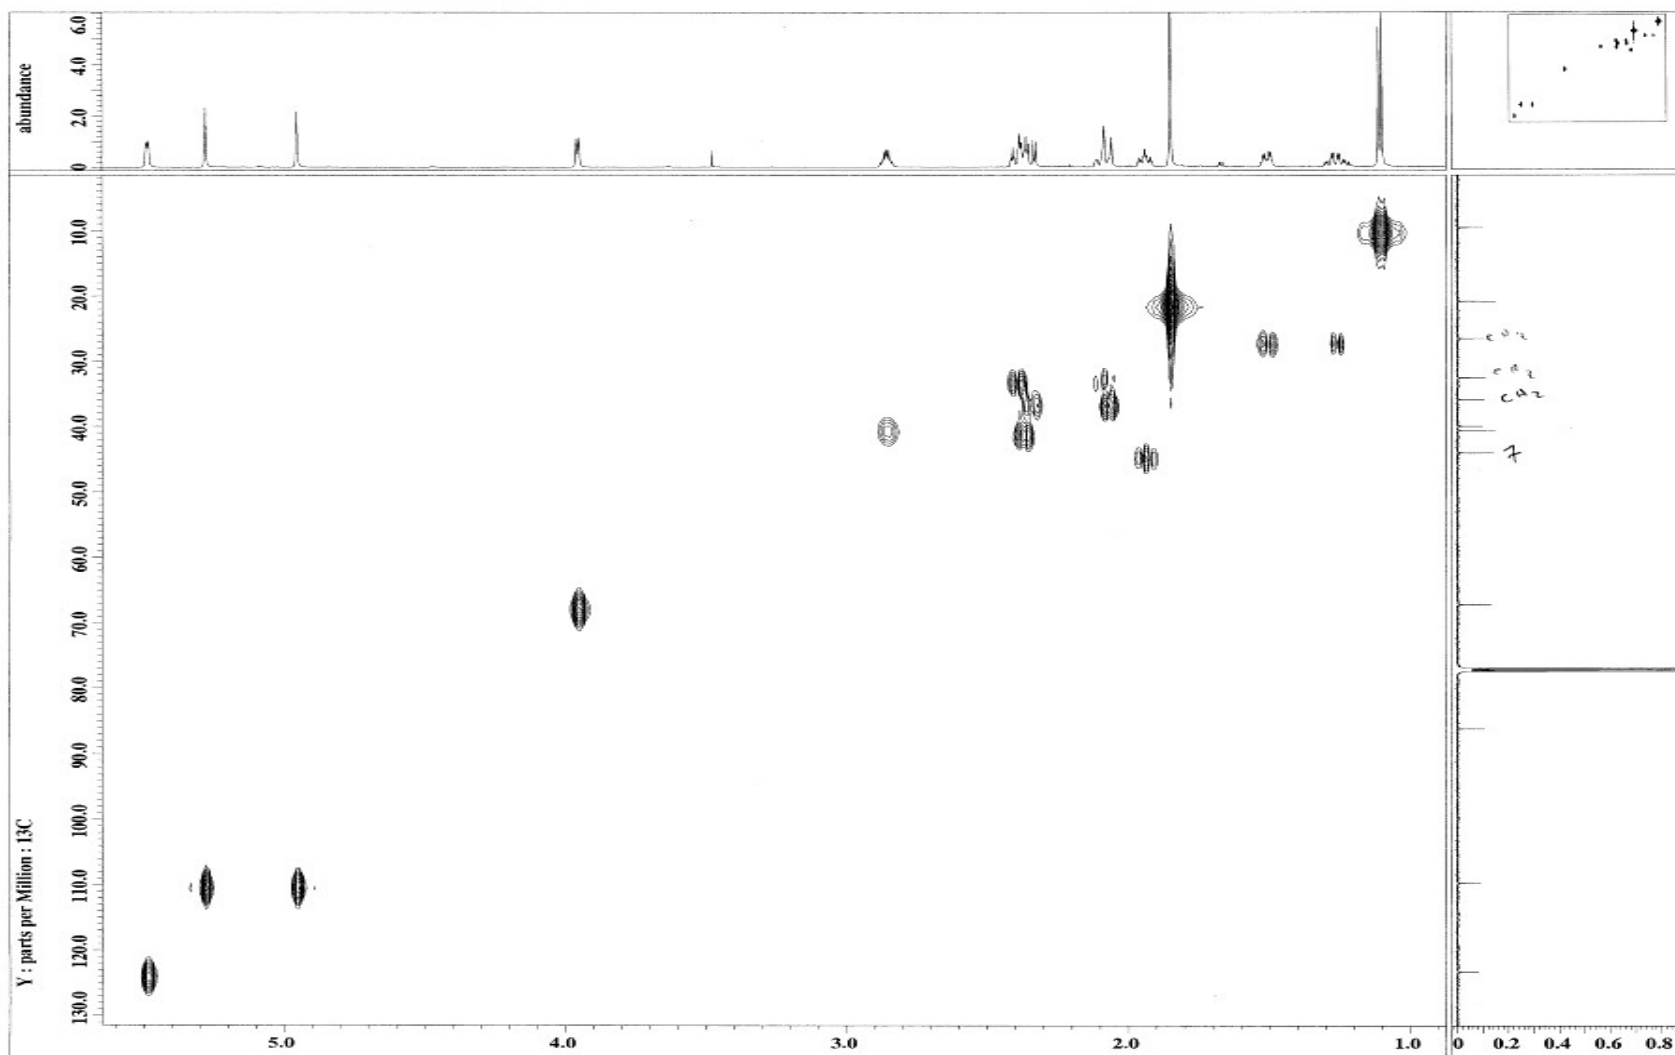

HMBC spectrum of **2** in CDCl<sub>3</sub>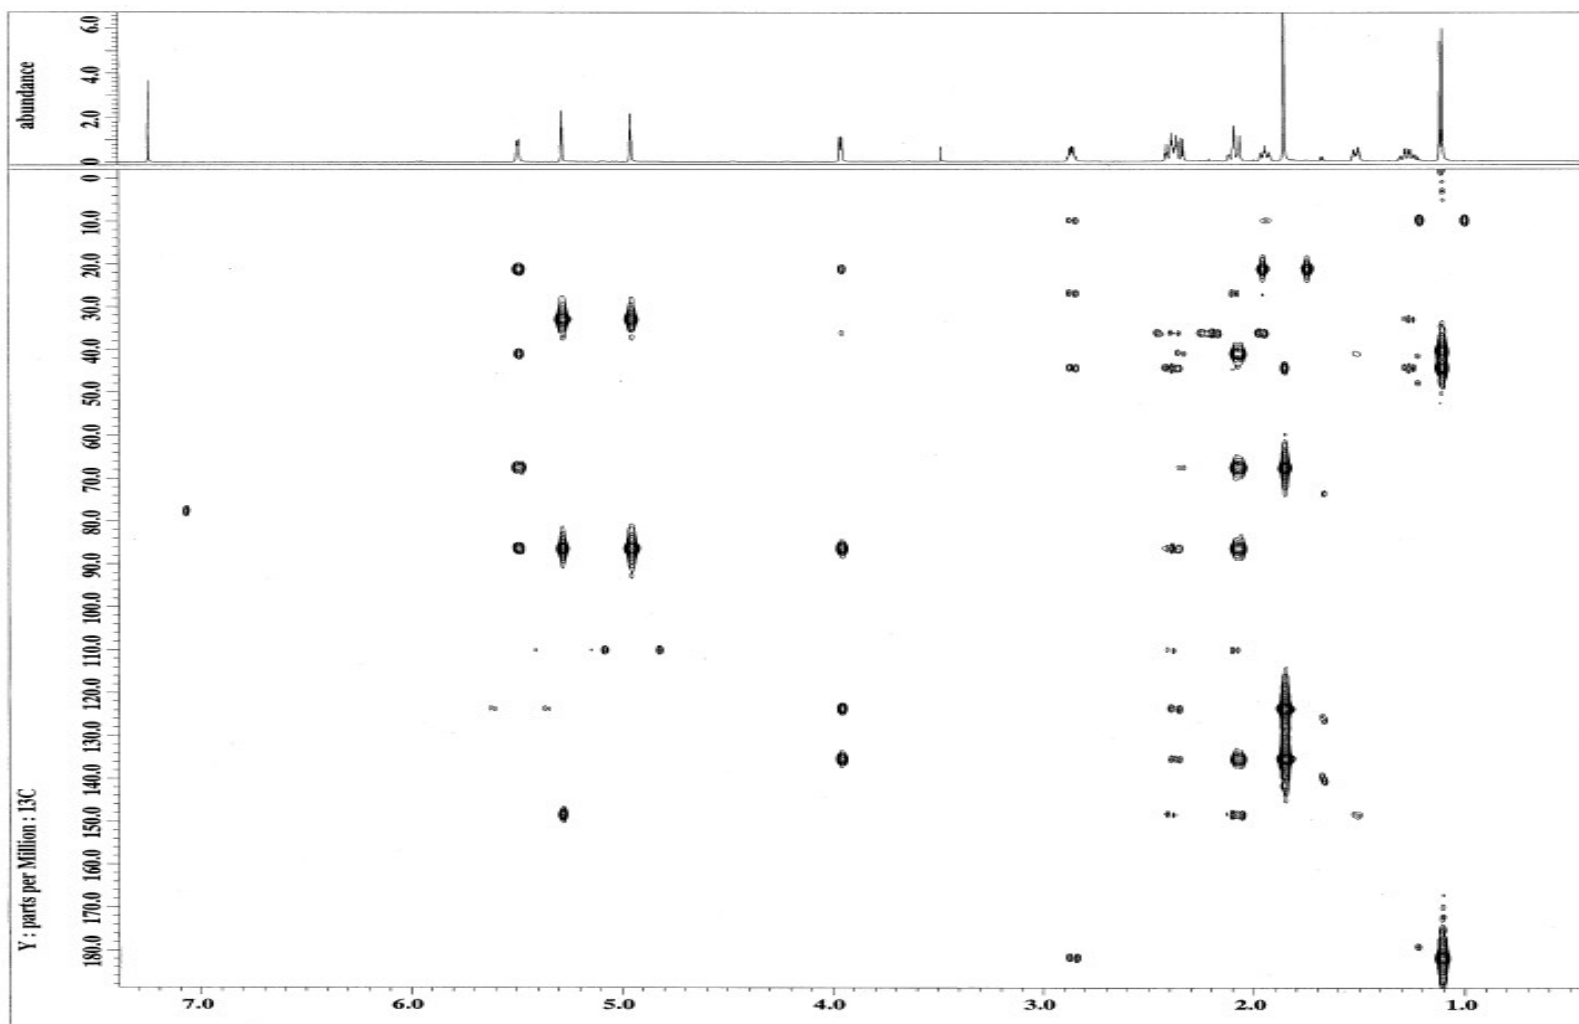

NOESY spectrum of **2** in CDCl<sub>3</sub>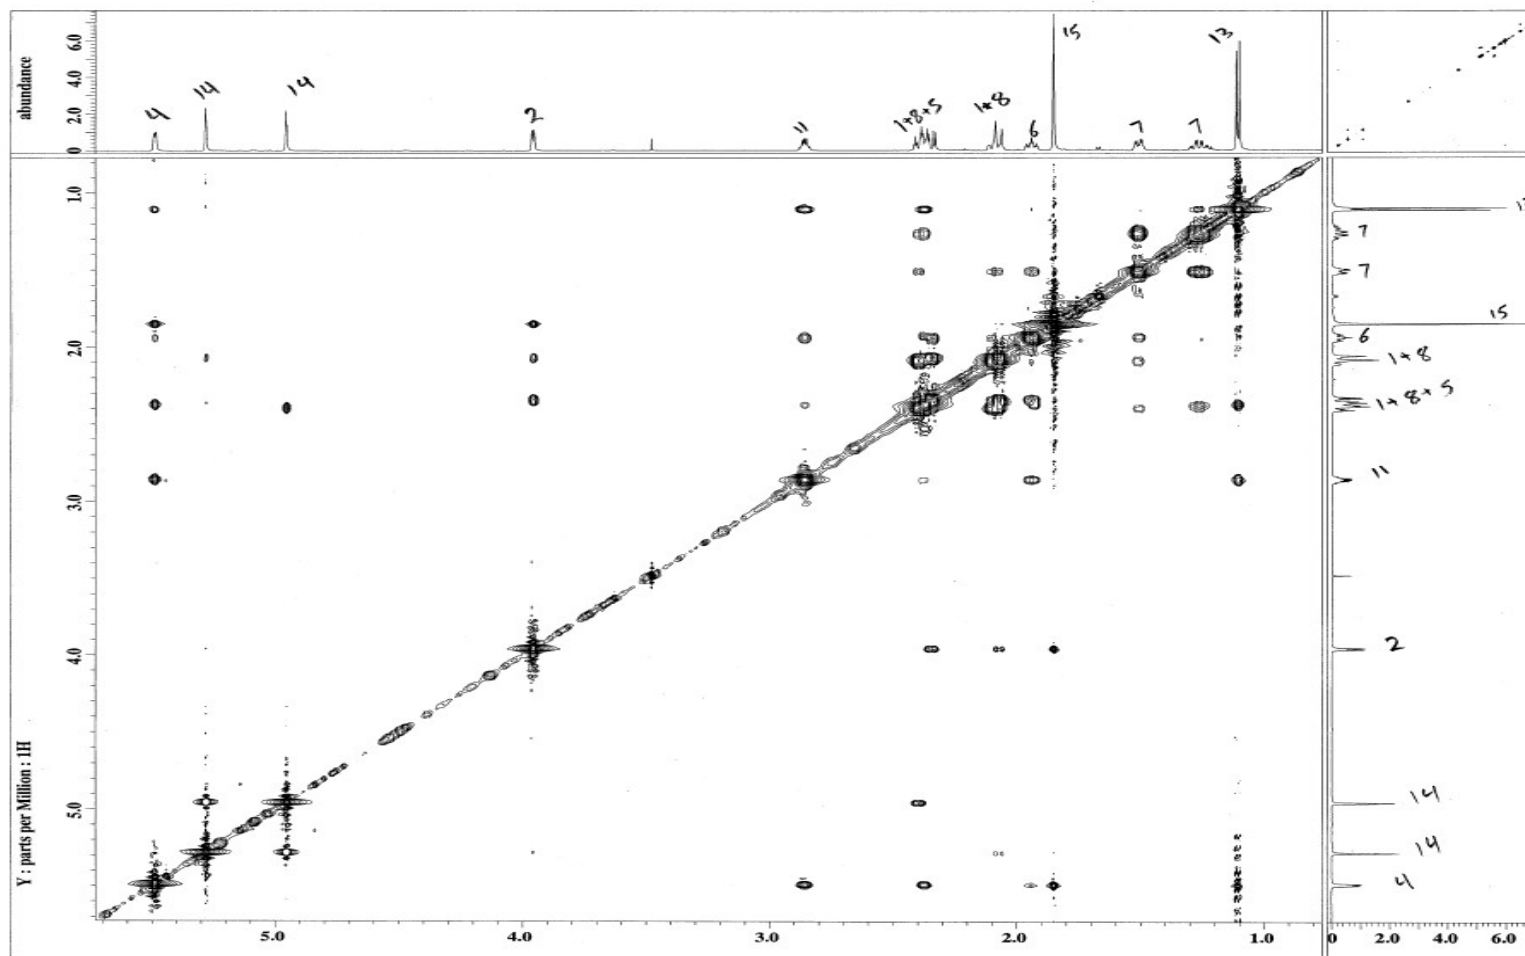



$^1\text{H}$  NMR spectrum **3** in  $\text{CDCl}_3$

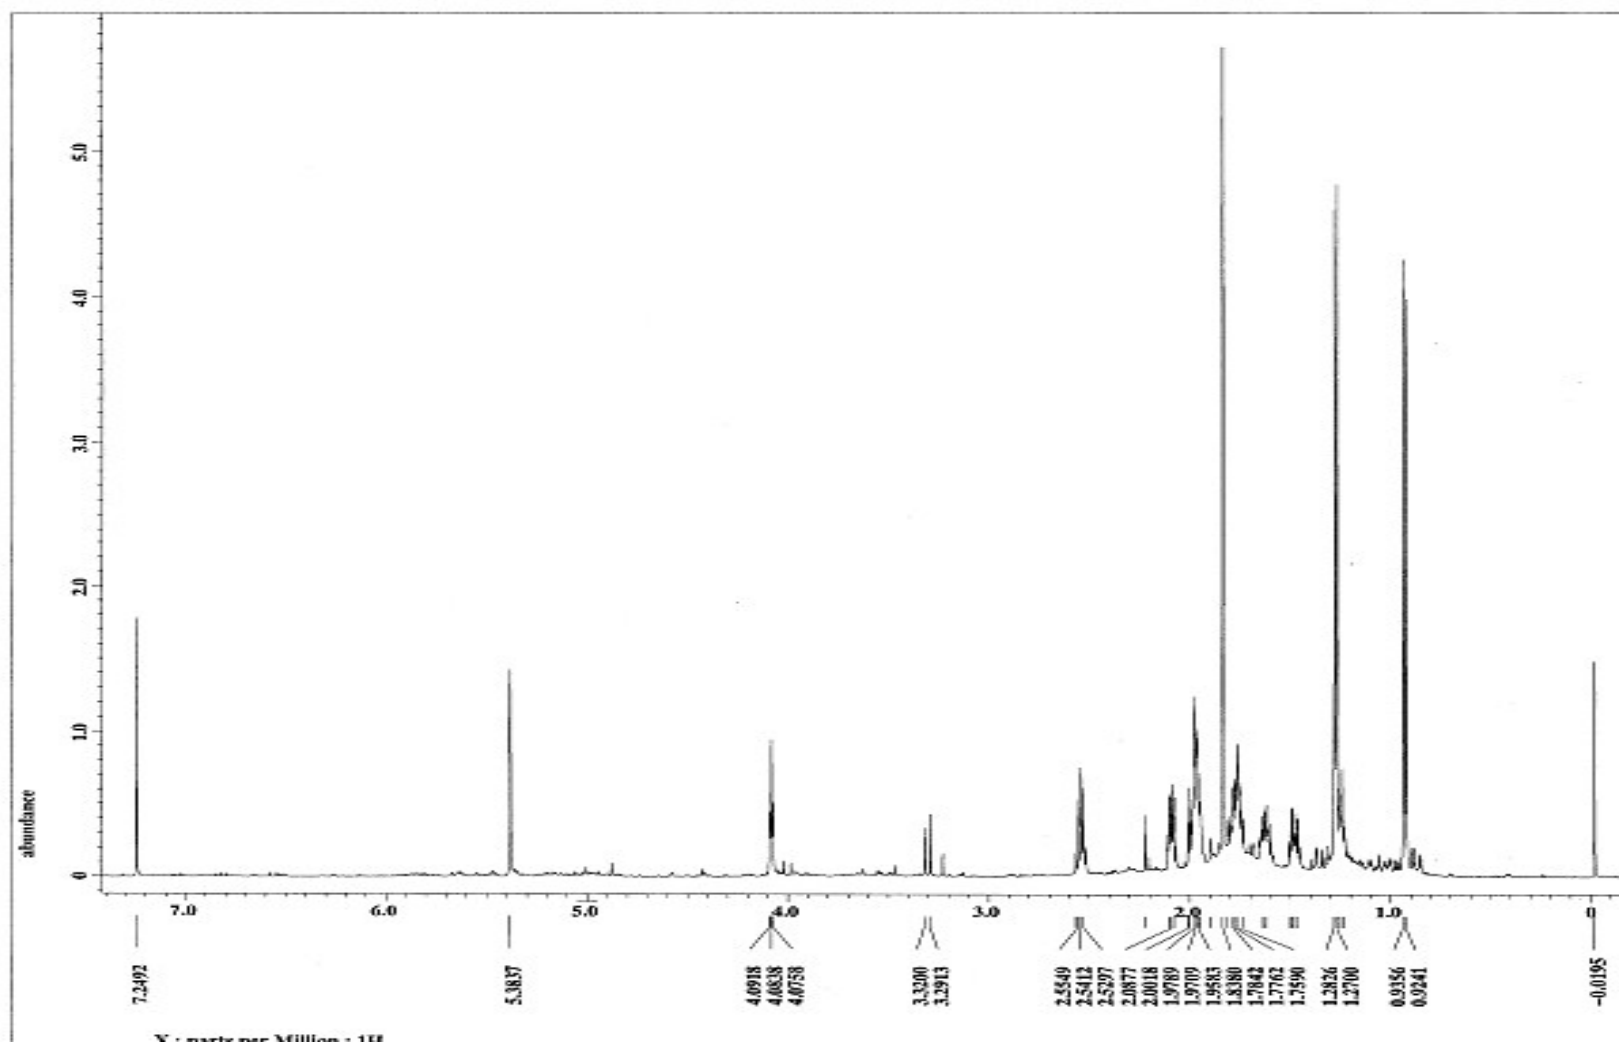

$^{13}\text{C}$  NMR and DEPT spectrum of **3** in  $\text{CDCl}_3$

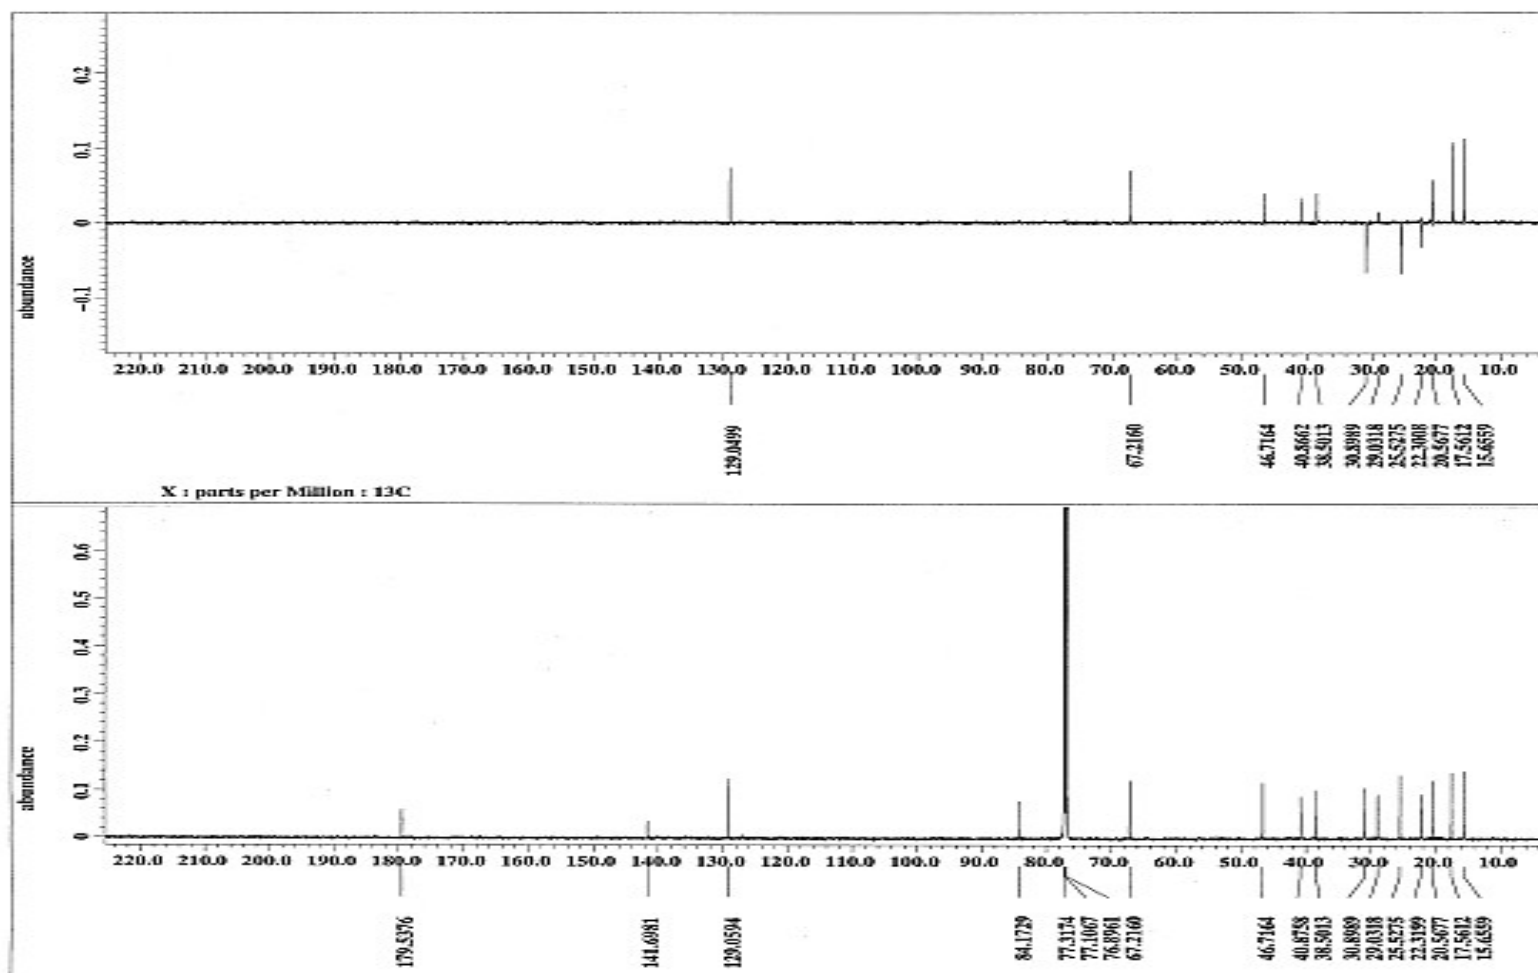

$^1\text{H}$ - $^1\text{H}$  COSY spectrum of **3** in  $\text{CDCl}_3$

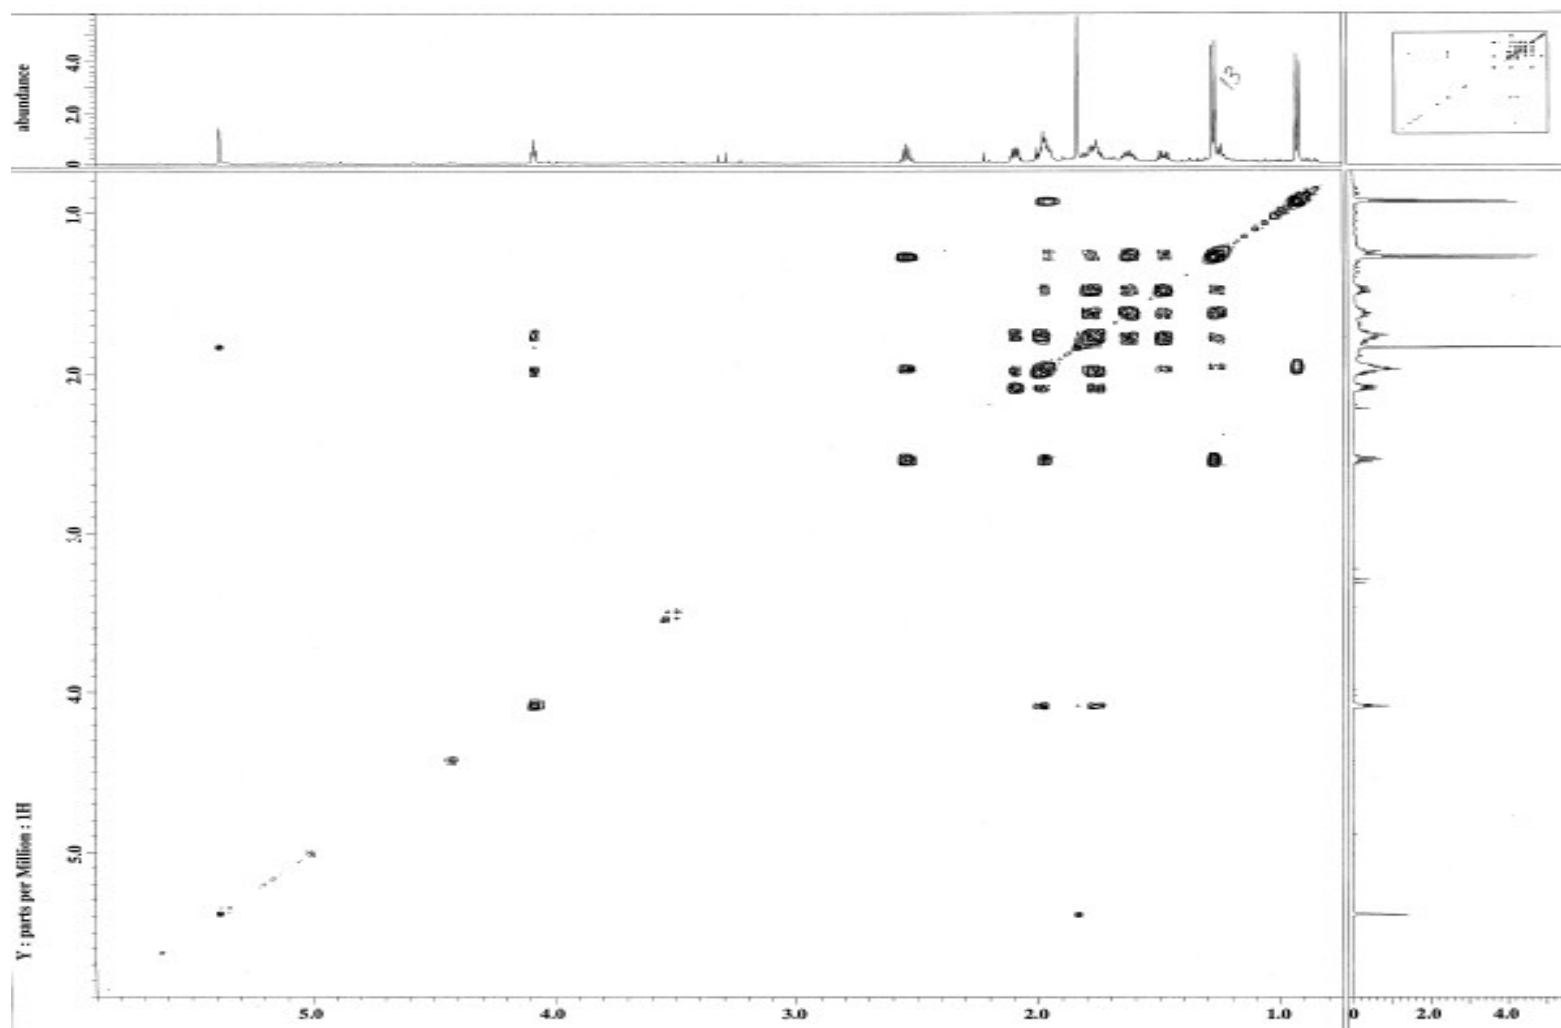

HMQC spectrum of **3** in  $\text{CDCl}_3$

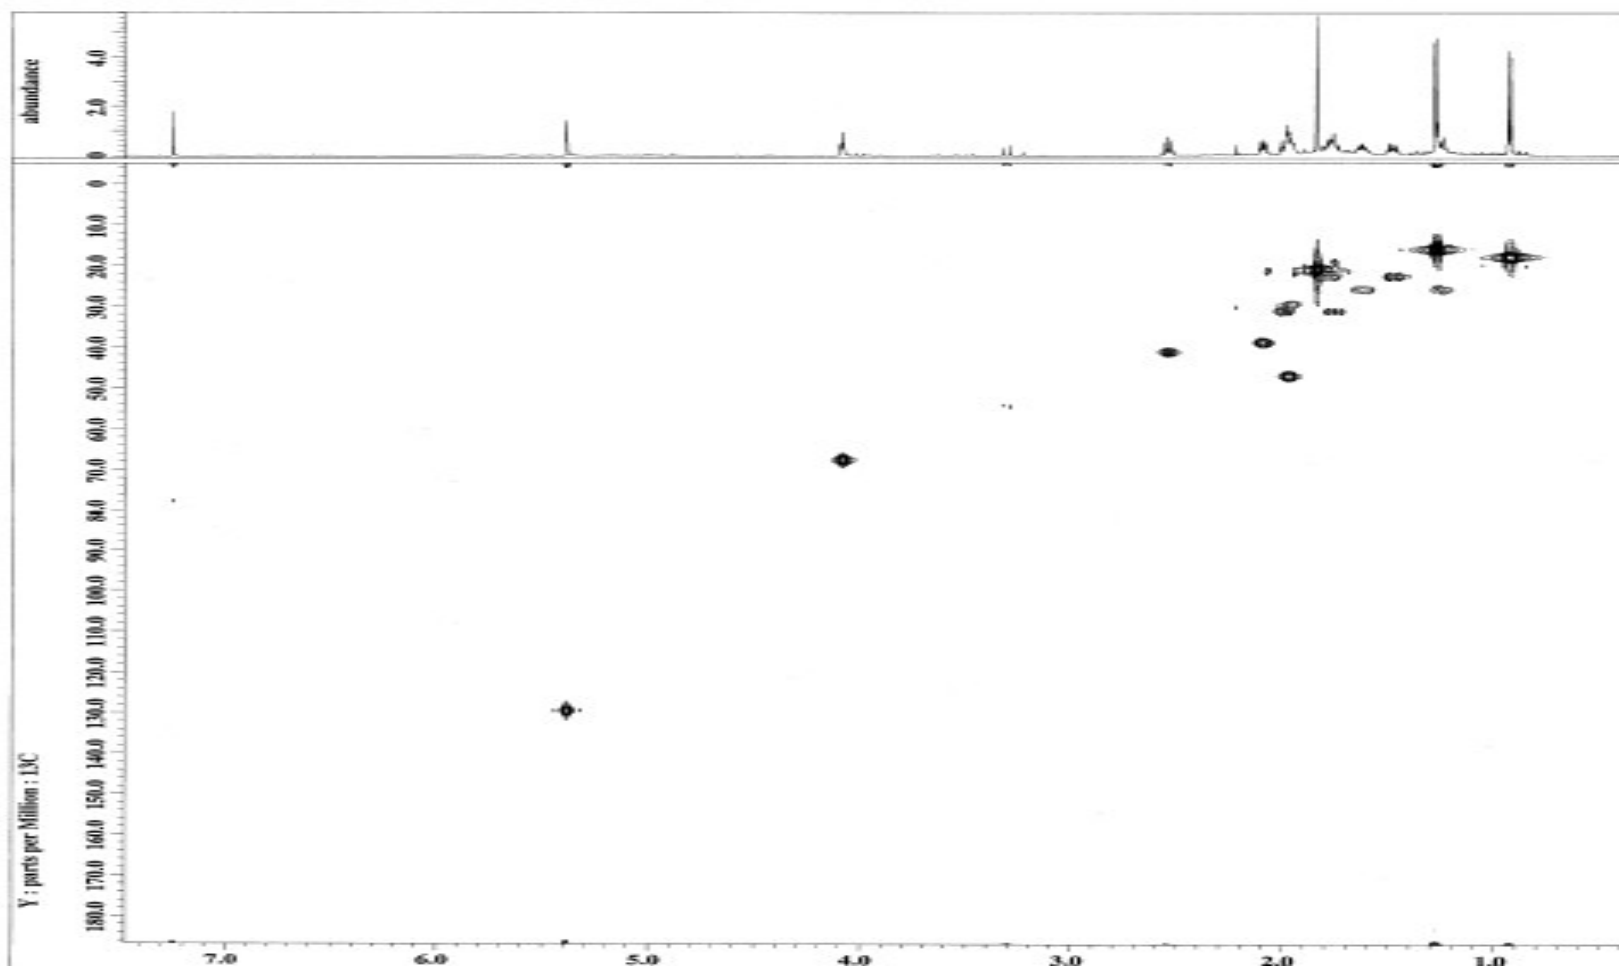

HMBC spectrum of **3** in CDCl<sub>3</sub>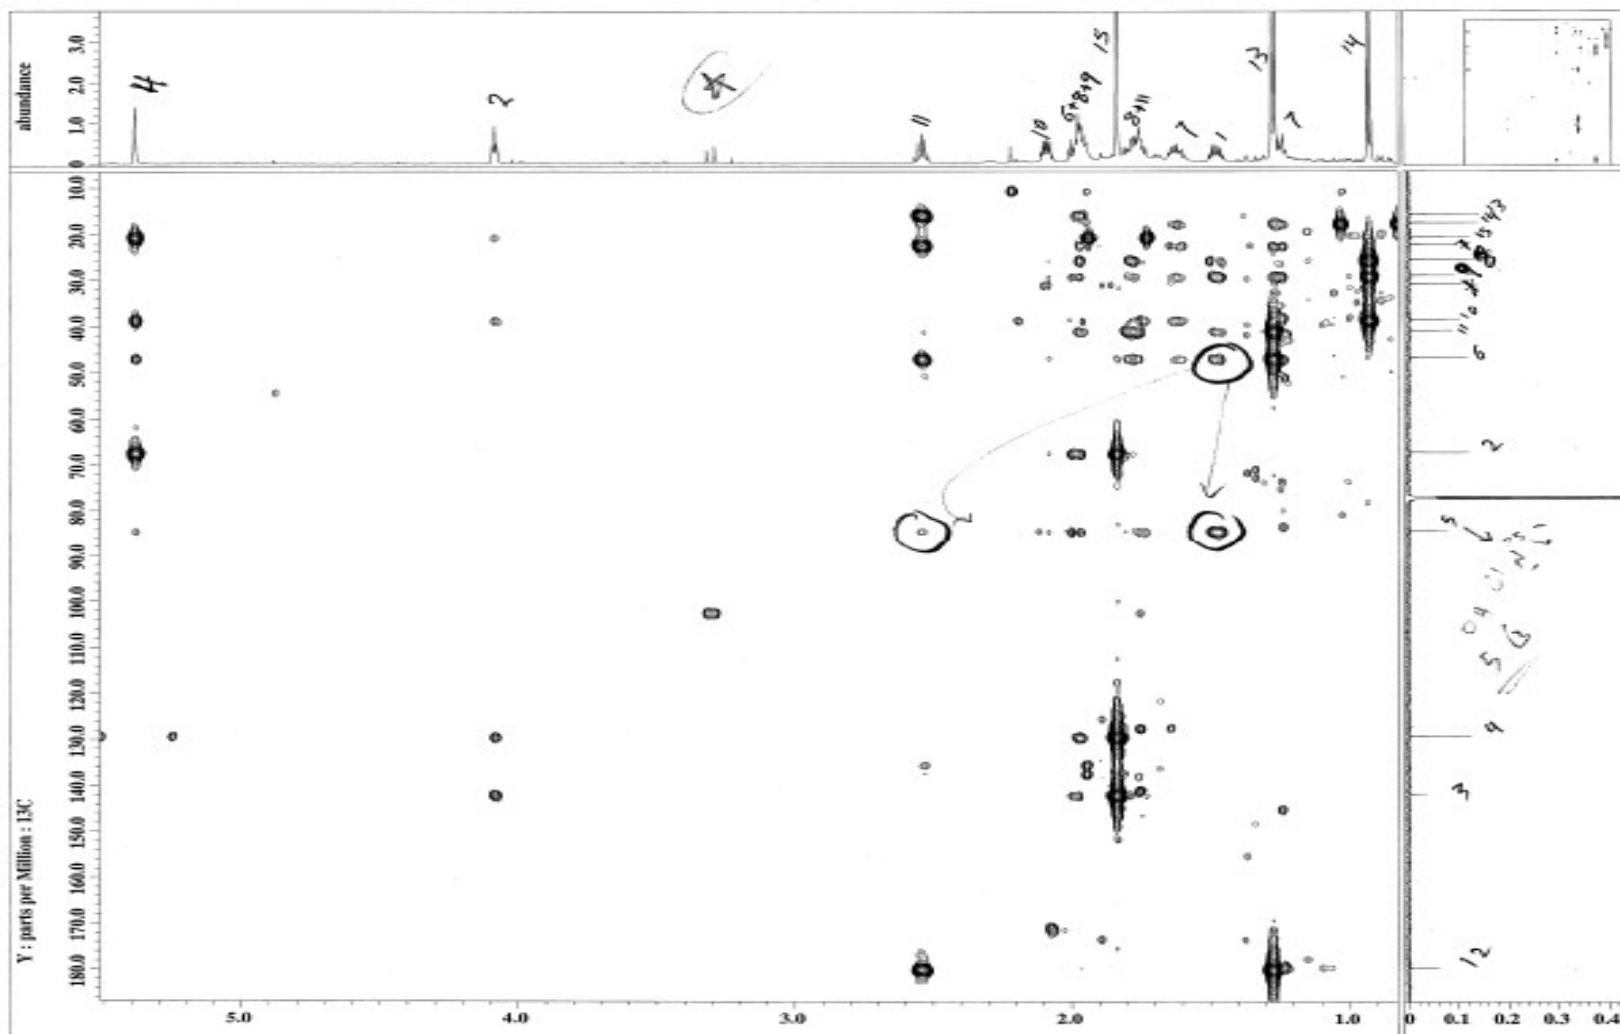

NOESY spectrum of **3** in  $\text{CDCl}_3$

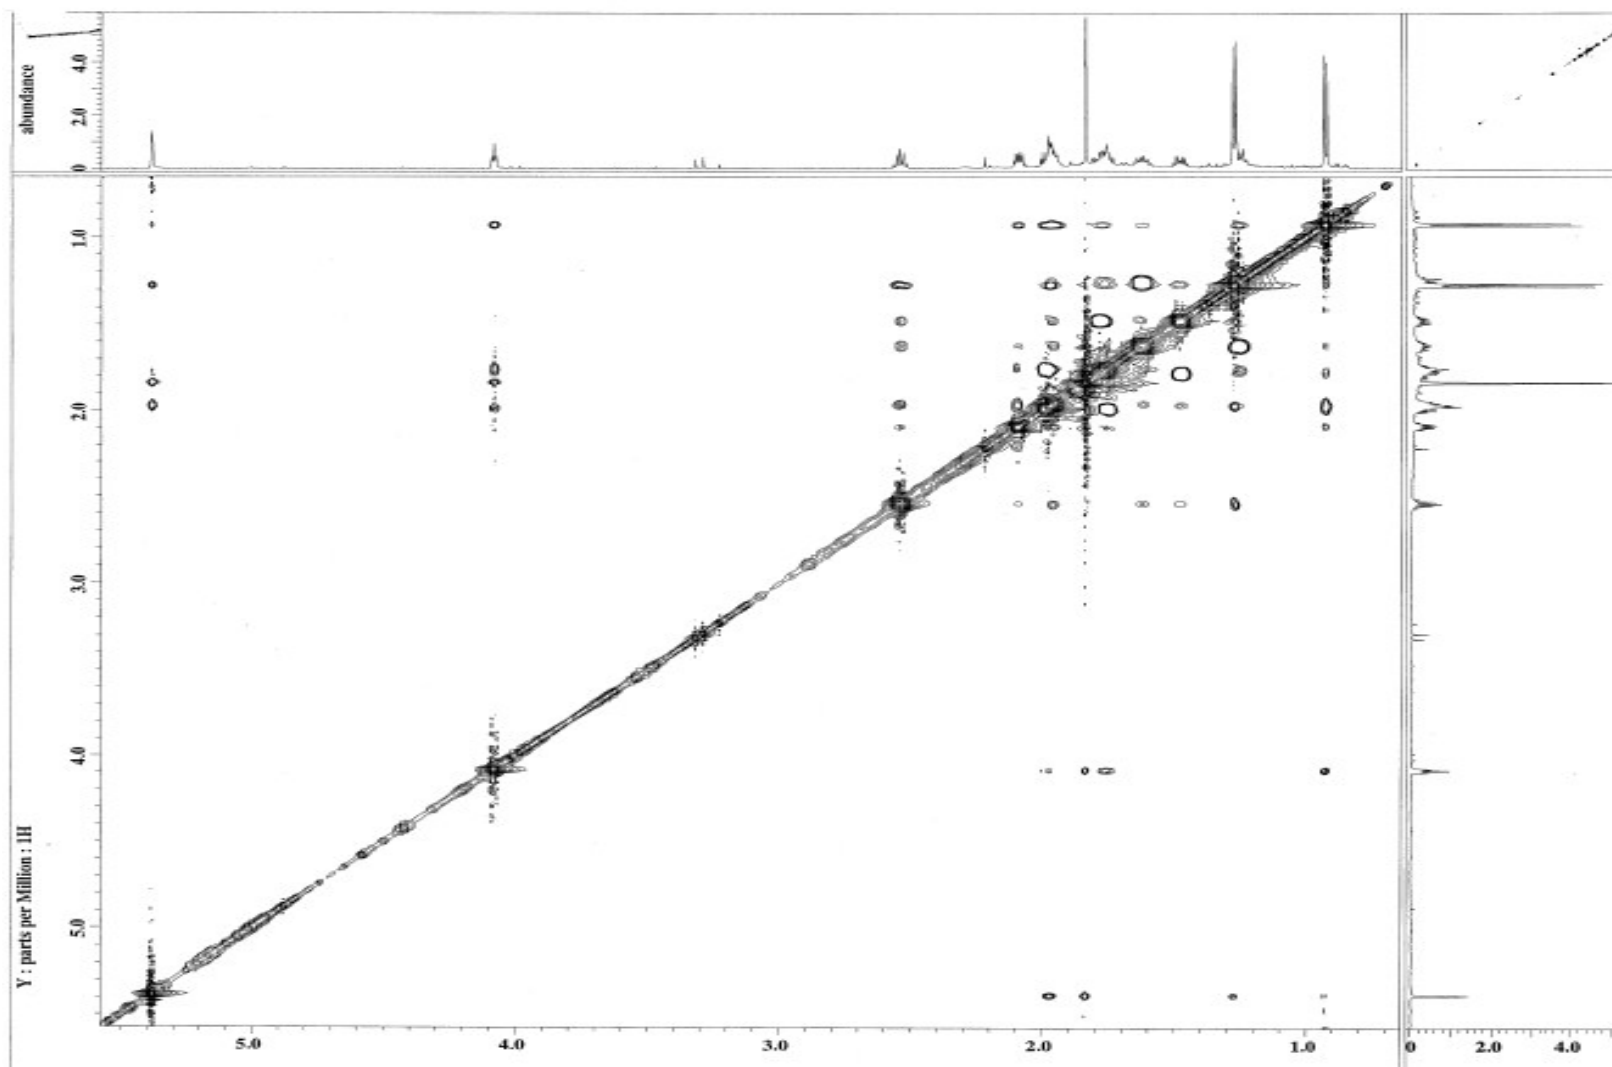

Supplement: c5ra07511d1.pdf [file c5ra07511d1.pdf]
